# Supplementary material
Source: publisher figshare collection journal article supplement (https://tandf.figshare.com/ndownloader/files/14021246)

**Supplemental figure 1:** Study design schematic for MEASURE 2-J study. BL, baseline; F, follow-up; PFS, pre-filled syringe; Q1W, every week; Q4W, every 4 weeks; s.c., subcutaneous


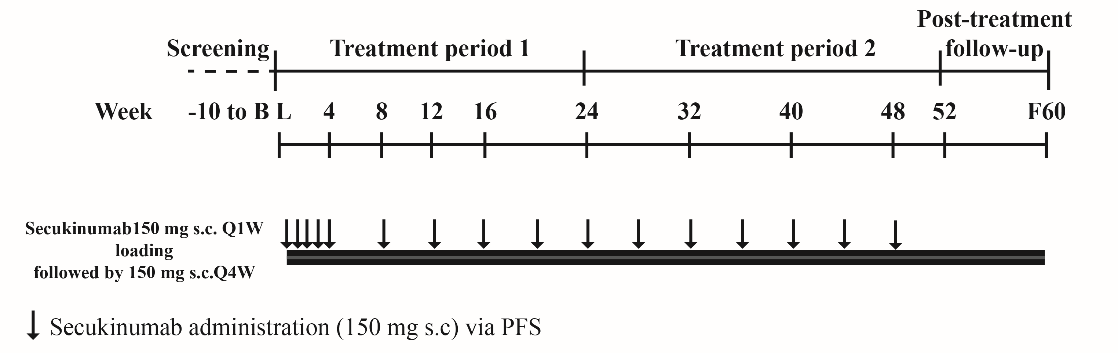

Supplement: Supplementary file 1 [file 14021246]
